# Supplementary material for: Diagnostic Accuracy of Various Immunochromatographic Tests for NS1 Antigen and IgM Antibodies Detection in Acute Dengue Virus Infection
Source: MDPI journal article supplement (doi:10.3390/ijerph19148756), 2022-07-19
Supplement: s1 [file s1]

**Supplementary Table**

**Supplementary Table S1: Excluded Full-Text Studies (N = 36).**

| No. | Author, year         | Title                                                                                                                                                                                              | DOI                                                                                                                 |
|-----|----------------------|----------------------------------------------------------------------------------------------------------------------------------------------------------------------------------------------------|---------------------------------------------------------------------------------------------------------------------|
| 1   | Lima, 2010           | Comparison of three commercially available dengue NS1 antigen capture assays for acute diagnosis of dengue in Brazil                                                                               | <a href="https://doi.org/10.1371/journal.pntd.0000738">https://doi.org/10.1371/journal.pntd.0000738</a>             |
| 2   | Mata, 2017           | Accuracy and reliability of an NS1 rapid immunochromatographic test for DENV-1 diagnosis at point of care and in the laboratory                                                                    | <a href="https://doi.org/10.1186/s12879-017-2679-z">https://doi.org/10.1186/s12879-017-2679-z</a>                   |
| 3   | Piedrahita, 2016     | Evaluation of Commercially Available Assays for Diagnosis of Acute Dengue in Schoolchildren during an Epidemic Period in Medellín, Colombia                                                        | <a href="https://doi.org/10.4269%2Fajtmh.15-0492">https://doi.org/10.4269%2Fajtmh.15-0492</a>                       |
| 4   | Vega, 2009           | Evaluation of PANBIO rapid immunochromatographic cassette for dengue diagnosis in a Colombian endemic area                                                                                         | <a href="https://pubmed.ncbi.nlm.nih.gov/20440460/">https://pubmed.ncbi.nlm.nih.gov/20440460/</a>                   |
| 5   | Simonnet, 2017       | Prospective evaluation of the SD BIOLINE Dengue Duo rapid test during a dengue virus epidemic                                                                                                      | <a href="https://doi.org/10.1007/s10096-017-3083-8">https://doi.org/10.1007/s10096-017-3083-8</a>                   |
| 6   | Vickers, 2017        | Evaluation of OneStep Dengue NS1 RapiDip™ InstaTest and OneStep Dengue Fever IgG/IgM RapiCard™ InstaTest during the course of a dengue type 1 epidemic                                             | <a href="https://doi.org/10.1016/j.diagmicrobio.2017.08.019">https://doi.org/10.1016/j.diagmicrobio.2017.08.019</a> |
| 7   | Vickers, 2015        | The performance of the SD BIOLINE Dengue DUO® rapid immunochromatographic test kit for the detection of NS1 antigen, IgM and IgG antibodies during a dengue type 1 epidemic in Jamaica             | <a href="https://doi.org/10.1186/s12929-015-0164-9">https://doi.org/10.1186/s12929-015-0164-9</a>                   |
| 8   | Sánchez-Vargas, 2014 | Evaluation of the SD BIOLINE dengue duo rapid test in the course of acute and convalescent dengue infections in a Mexican endemic region                                                           | <a href="https://doi.org/10.1016/j.diagmicrobio.2013.12.019">https://doi.org/10.1016/j.diagmicrobio.2013.12.019</a> |
| 9   | Ramirez, 2009        | Evaluation of dengue NS1 antigen detection tests with acute sera from patients infected with dengue virus in Venezuela                                                                             | <a href="https://doi.org/10.1016/j.diagmicrobio.2009.07.022">https://doi.org/10.1016/j.diagmicrobio.2009.07.022</a> |
| 10  | Sharmin, 2011        | Evaluation of an immunochromatographic test for early and rapid detection of dengue virus infection in the context of Bangladesh.                                                                  | <a href="https://apps.who.int/iris/handle/10665/171008">https://apps.who.int/iris/handle/10665/171008</a>           |
| 11  | Shukla, 2017         | Utility of dengue NS1 antigen rapid diagnostic test for use in difficult to reach areas and its comparison with dengue NS1 ELISA and qRT-PCR                                                       | <a href="https://doi.org/10.1002/jmv.24764">https://doi.org/10.1002/jmv.24764</a>                                   |
| 12  | Garg, 2019           | Can rapid dengue diagnostic kits be trusted? A comparative study of commercially available rapid kits for serodiagnosis of dengue fever                                                            | <a href="https://doi.org/10.4103/jlp.jlp_140_18">https://doi.org/10.4103/jlp.jlp_140_18</a>                         |
| 13  | Shrivastava, 2011    | Evaluation of a commercial Dengue NS1 enzyme-linked immunosorbent assay for early diagnosis of dengue infection                                                                                    | <a href="https://doi.org/10.4103/0255-0857.76525">https://doi.org/10.4103/0255-0857.76525</a>                       |
| 14  | Sathish, 2001        | Comparison of IgM capture ELISA with a commercial rapid immunochromatographic card test & IgM microwell ELISA for the detection of antibodies to dengue viruses                                    | <a href="https://pubmed.ncbi.nlm.nih.gov/12138661/">https://pubmed.ncbi.nlm.nih.gov/12138661/</a>                   |
| 15  | Vajpayee, 2001       | Comparative Evaluation of Various Commercial Assays for Diagnosis of Dengue Fever                                                                                                                  | <a href="https://pubmed.ncbi.nlm.nih.gov/11944701/">https://pubmed.ncbi.nlm.nih.gov/11944701/</a>                   |
| 16  | Babalish, 2006       | Catching Dengue Early: Clinical Features and Laboratory Markers of Dengue Virus Infection                                                                                                          | <a href="https://europepmc.org/article/med/26591143">https://europepmc.org/article/med/26591143</a>                 |
| 17  | Moorthy, 2009        | Evaluation of a rapid immunochromatographic device for the detection of IgM & IgG antibodies to dengue viruses (DENV) in a tertiary care hospital in south India                                   | <a href="https://doi.org/10.4103/0255-0857.53210">https://doi.org/10.4103/0255-0857.53210</a>                       |
| 18  | Gaikwad, 2017        | Comparison of nonstructural protein-1 antigen detection by rapid and enzyme-linked immunosorbent assay test and its correlation with polymerase chain reaction for early diagnosis of dengue       | <a href="https://doi.org/10.4103/0974-2727.208265">https://doi.org/10.4103/0974-2727.208265</a>                     |
| 19  | Blacksell, 2007      | Prospective Study To Determine Accuracy of Rapid Serological Assays for Diagnosis of Acute Dengue Virus Infection in Laos                                                                          | <a href="https://doi.org/10.1128/CVI.00482-06">https://doi.org/10.1128/CVI.00482-06</a>                             |
| 20  | Blessmann, 2020      | Assessment of diagnostic and analytic performance of the SD Bioline Dengue Duo test for dengue virus (DENV) infections in an endemic area (Savannakhet province, Lao People's Democratic Republic) | <a href="https://doi.org/10.1371/journal.pone.0230337">https://doi.org/10.1371/journal.pone.0230337</a>             |
| 21  | Somlor, 2021         | Evaluation of VIDAS® Diagnostic Assay Prototypes Detecting Dengue Virus NS1 Antigen and Anti-Dengue Virus IgM and IgG Antibodies                                                                   | <a href="https://doi.org/10.3390/diagnostics11071228">https://doi.org/10.3390/diagnostics11071228</a>               |
| 22  | Chong, 2020          | Diagnostic accuracy and utility of three dengue diagnostic tests for the diagnosis of acute dengue infection in Malaysia                                                                           | <a href="https://doi.org/10.1186/s12879-020-4911-5">https://doi.org/10.1186/s12879-020-4911-5</a>                   |

|    |                          |                                                                                                                                                                                      |                                                                                                         |
|----|--------------------------|--------------------------------------------------------------------------------------------------------------------------------------------------------------------------------------|---------------------------------------------------------------------------------------------------------|
| 23 | Fry, 2011                | The Diagnostic Sensitivity of Dengue Rapid Test Assays Is Significantly Enhanced by Using a Combined Antigen and Antibody Testing Approach                                           | <a href="https://doi.org/10.1371/journal.pntd.0001199">https://doi.org/10.1371/journal.pntd.0001199</a> |
| 24 | Jusoh, 2017              | Performance Evaluation of Commercial Dengue Diagnostic Tests for Early Detection of Dengue in Clinical Samples                                                                       | <a href="https://doi.org/10.1155/2017/4687182">https://doi.org/10.1155/2017/4687182</a>                 |
| 25 | Fredolin, 2018           | Evaluation of a commercial dengue combo rapid test kit for the detection of NS1 and IgM                                                                                              | <a href="https://pubmed.ncbi.nlm.nih.gov/33601826/">https://pubmed.ncbi.nlm.nih.gov/33601826/</a>       |
| 26 | Teoh, 2016               | The Use of NS1 Rapid Diagnostic Test and qRT-PCR to Complement IgM ELISA for Improved Dengue Diagnosis from Single Specimen                                                          | <a href="https://doi.org/10.1038/srep27663">https://doi.org/10.1038/srep27663</a>                       |
| 27 | Pun, 2012                | Prognostic Value of Rapid Test for Diagnosis of Dengue in Nepalese Patients during 2010 Epidemic                                                                                     | <a href="https://doi.org/10.3126/kumj.v10i1.6905">https://doi.org/10.3126/kumj.v10i1.6905</a>           |
| 28 | Guzman, 2010             | Dengue: a continuing global threat                                                                                                                                                   | <a href="https://doi.org/10.1038/nrmicro2460">https://doi.org/10.1038/nrmicro2460</a>                   |
| 29 | Pal, 2015                | Multicountry Prospective Clinical Evaluation of Two Enzyme-Linked Immunosorbent Assays and Two Rapid Diagnostic Tests for Diagnosing Dengue Fever                                    | <a href="https://doi.org/10.1128/JCM.03042-14">https://doi.org/10.1128/JCM.03042-14</a>                 |
| 30 | Vaira, 2016              | Clinical, Virologic, and Epidemiologic Characteristics of Dengue Outbreak, Dar es Salaam, Tanzania, 2014                                                                             | <a href="https://doi.org/10.3201%2Fcid2205.151462">https://doi.org/10.3201%2Fcid2205.151462</a>         |
| 31 | Lim, 2019                | Clinical and epidemiologic characteristics associated with dengue during and outside the 2016 outbreak identified in health facility-based surveillance in Ouagadougou, Burkina Faso | <a href="https://doi.org/10.1371/journal.pntd.0007882">https://doi.org/10.1371/journal.pntd.0007882</a> |
| 32 | Sanou, 2018              | Clinical and epidemiologic characteristics associated with dengue during and outside the 2016 outbreak identified in health facility-based surveillance in Ouagadougou, Burkina Faso | <a href="https://doi.org/10.1371/journal.pntd.0007882">https://doi.org/10.1371/journal.pntd.0007882</a> |
| 33 | Naz, 2013                | Evaluation of efficacy of various immunochromatographic rapid tests for dengue diagnosis                                                                                             | <a href="https://doi.org/10.12669%2Fpjms.301.4173">https://doi.org/10.12669%2Fpjms.301.4173</a>         |
| 34 | Krishnananthasivam, 2015 | Evaluation of a Commercial Rapid Test Kit for Detection of Acute Dengue Infection                                                                                                    | <a href="https://pubmed.ncbi.nlm.nih.gov/26867379/">https://pubmed.ncbi.nlm.nih.gov/26867379/</a>       |
| 35 | Lee, 2015                | Enhanced performance of an innovative dengue IgG/IgM rapid diagnostic test using an anti-dengue EDI monoclonal antibody and dengue virus antigen                                     | <a href="https://doi.org/10.1038/srep18077">https://doi.org/10.1038/srep18077</a>                       |
| 36 | Wang, 2010               | Early Diagnosis of Dengue Infection Using a Commercial Dengue Duo Rapid Test Kit for the Detection of NS1, IGM, and IGG                                                              | <a href="https://doi.org/10.4269%2Fajtmh.2010.10-0117">https://doi.org/10.4269%2Fajtmh.2010.10-0117</a> |
